# Supplementary material
Source: PubMed Central journal article supplement (PMC4258188)
Supplement: NIHMS600868-supplement-1.pdf [file NIHMS600868-supplement-1.pdf]

Supplementary Table 1

Sequence of primers used for RT-PCR analysis

| Name            | Sequence (5' to 3')            |
|-----------------|--------------------------------|
| Evi-1 F         | GCA GCG ACA TGT GCG CAA CA     |
| Evi-1 R         | GAG GCG AGG ACG TTG CCG TC     |
| Pbx1 F          | AAG CCG GAC CAG GCC CAT CT     |
| Pbx1 R          | GGC CTC GCA CGT GCT CTG TT     |
| Gata2 F         | CTG CCA GAA GAG CGG GCA CC     |
| Gata2 R         | CAC ACA GGG TCC CCG TTG GC     |
| Sall2 F         | AGA GTT GCG GGT GCT GCA GC     |
| Sall2 R         | TCT GAG GGA CTG GCA GGG GC     |
| Hoxa5 F         | CAT AGT TCC GTG AGC GAA CA     |
| Hoxa5 R         | AGA TCC ATG CCA TTG TAG CC     |
| Egr1 F          | TTT CCT CAC TCA CCC ACC AT     |
| Egr1 R          | TTG CTC AGC AGC ATC ATC TC     |
| Tie1 F          | GTG CCA GTG TCA AAA TGG TG     |
| Tie1 R          | GGA TCC GGT CTG ACT TTT CA     |
| Robo4 F         | CTG ACC CCT ACA GAG GCT TG     |
| Robo4 R         | GAG CAG TGG GGA GCT GTT AG     |
| Jag1 F          | GCT GGA TGG GTC AGA ACT GT     |
| Jag1 R          | TAA CCA AAT CCC GAC AGG AG     |
| Survivin F      | CTG GAG GAC TGC GCC TGC AC     |
| Survivin R      | AGG CTC GTT CTC GGT AGG GCA    |
| Survivin 121 F  | TGA TTG AGA ATA AGG ACT GAG CA |
| Survivin 121 R  | AAG CAC CCT TCC TGA GCA        |
| HPRT F          | TTG CTG ACC TGC TGG ATT AC     |
| HPRT R          | TAT GTC CCC CGT TGA CTG A      |
| GAPDH F         | ATG GTG AAG GTC GGT GTG AAC G  |
| GAPDH R         | GTT GTC ATG GAT GAC CTT GGC C  |
| Evi-1 F (human) | GAG TCA TGC CAA CCC GGG CC     |
| Evi-1 R (human) | ACC TCT CGG GCT GGA GCT CC     |
