# Supplementary material
Source: PubMed Central journal article supplement (PMC4258188)
Supplement: NIHMS600868-supplement-2.pdf [file NIHMS600868-supplement-2.pdf]

## **SUPPLEMENTARY TABLE LEGEND**

**Table S1:** Sequence of RT-PCR primers.
