# Supplementary material
Source: PubMed Central journal article supplement (PMC4258188)
Supplement: NIHMS600868-supplement-4.pdf [file NIHMS600868-supplement-4.pdf]

## SUPPLEMENTARY FIGURE LEGENDS

**Supplementary Figure 1.** CD45.2/CD45.1 ratios in the recipients transplanted with (A) 2:1 and (B) 0.5:1 ratios of Survivin<sup>fl/fl</sup> marrow cells:competitor cells (red squares) or Mx1-Cre Survivin<sup>fl/fl</sup> marrow cells:competitor cells (blue diamonds) at 4 weeks post-transplantation prior to polyI:polyC treatment and at 4 week intervals thereafter. \*P<0.05 (N=10).
