# Supplementary material
Source: PubMed Central journal article supplement (PMC4258188)

Supplementary Figure 1

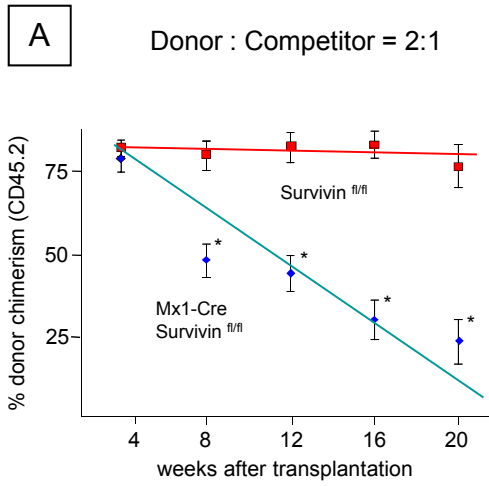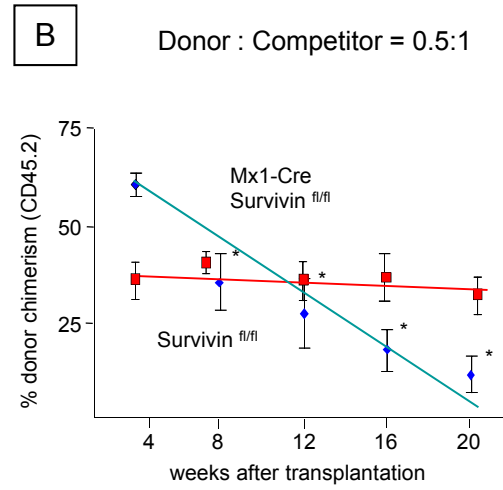

Supplement: NIHMS600868-supplement-3.pdf [file NIHMS600868-supplement-3.pdf]
